# Supplementary figures and images for: Mutant IDH1 Expression Drives TERT Promoter Reactivation as Part of the Cellular Transformation Process
Source: Oxford University Press journal article supplement (doi:10.1158/0008-5472.can-16-0696), 2016-10-06

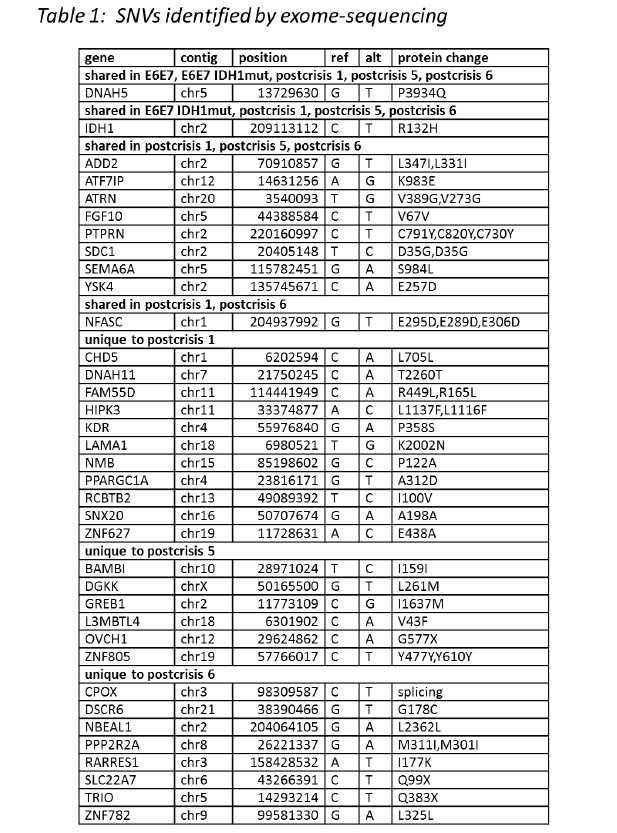

Supplement: 00085472can160696-sup-163351_1_supp_3669933_mdm2tr.docx [file 00085472can160696-sup-163351_1_supp_3669933_mdm2tr.docx]
